# Supplementary material
Source: publisher figshare collection journal article supplement (https://frontiersin.figshare.com/ndownloader/files/28983828)
Supplement: Supplementary file 1 [file 28983828]

# Supplementary Material 8

# List of assessment reports produced in New Caledonia and Indian Ocean

## New Caledonia

Assessment reports are in French with an English abstract.

| **Surveyed area and year** | **DOI** |
| --- | --- |
| Borendy 2012 | <http://doi.org/10.13155/38523> |
| Pweevo 2012 | [http://doi.org/10.13155/38522](https://domicile.ifremer.fr/10.13155/,DanaInfo=doi.org+38522) |
| Hyehen 2012 | [http://doi.org/10.13155/38521](https://domicile.ifremer.fr/10.13155/,DanaInfo=doi.org+38521) |
| Bourail 2012 | [http://doi.org/10.13155/38083](https://domicile.ifremer.fr/10.13155/,DanaInfo=doi.org+38083) |
| Matthew-Hunter 2014 | [http://doi.org/10.13155/38084](https://domicile.ifremer.fr/10.13155/,DanaInfo=doi.org+38084) |
| Chesterfield-Bellona 2013 | [http://doi.org/10.13155/49247](https://domicile.ifremer.fr/10.13155/,DanaInfo=doi.org+49247) |
| Koné 2007-2013 | http://doi.org/10.13155/47109 |
| Lifou 2014 | [http://doi.org/10.13155/47348](https://domicile.ifremer.fr/10.13155/,DanaInfo=doi.org+47348) |
| Entrecasteaux 2015 | [http://doi.org/10.13155/51760](https://domicile.ifremer.fr/10.13155/,DanaInfo=doi.org+51760) |
| Petrie-Astrolabe-Walpole 2014 | [http://doi.org/10.13155/51738](https://domicile.ifremer.fr/10.13155/,DanaInfo=doi.org+51738) |
| Corne Sud 2013 | http://doi.org/10.13155/51758 |
| Merlet Reserve 2013 | http://doi.org/10.13155/51756 |

## Indian Ocean

| **Surveyed area and year** | **DOI** |
| --- | --- |
| Réunion Island Natural Marine Reserve :  2015 and 2016  2017 | <http://archimer.ifremer.fr/doc/00410/52122/>  https://doi.org/10.13155/62474 |
| Geyser and Iris Banks 2016 | <https://doi.org/10.13155/54549> |
| Mayotte Natural Marine Park 2017 | <https://doi.org/10.13155/59659> |
| Mayotte Natural Marine Park 2014 | <http://archimer.ifremer.fr/doc/00373/48421/>  <http://archimer.ifremer.fr/doc/00373/48423/>  <http://archimer.ifremer.fr/doc/00373/48422/> |
